# Supplementary material for: Synthesis of 2D NiCo–MOF/GO/CNTs flexible films for high-performance supercapacitors
Source: Royal Society of Chemistry journal article supplement (doi:10.1039/d4sm01139b), 2024-12-17
Supplement: d4sm01139b1.pdf [file d4sm01139b1.pdf]

## Supplementary Information

### Synthesis of 2D NiCo-MOF/GO/CNTs Flexible Films for High-Performance Supercapacitors

Yu Cao<sup>1</sup>, Mingji Wu<sup>2</sup>, Yu chen<sup>1</sup>, and Xiaomiao Feng\*<sup>1</sup>

<sup>1</sup> Key Laboratory for Organic Electronics and Information Displays & Institute of Advanced Materials (IAM), School of Materials Science & Engineering, Nanjing University of Posts and Telecommunications, Nanjing 210023, China

<sup>2</sup> Aerospace Newsky Technology Co. Ltd. Wuxi 214062, China

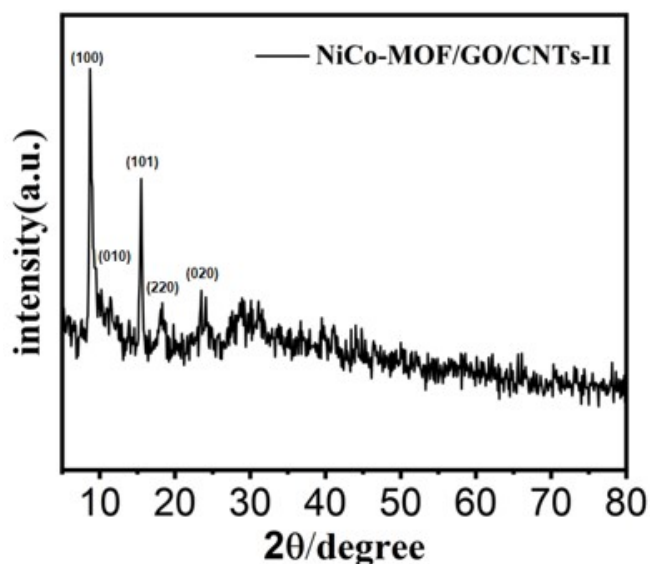

Fig.S1. XRD pattern of NiCo-MOF/GO/CNTs-II

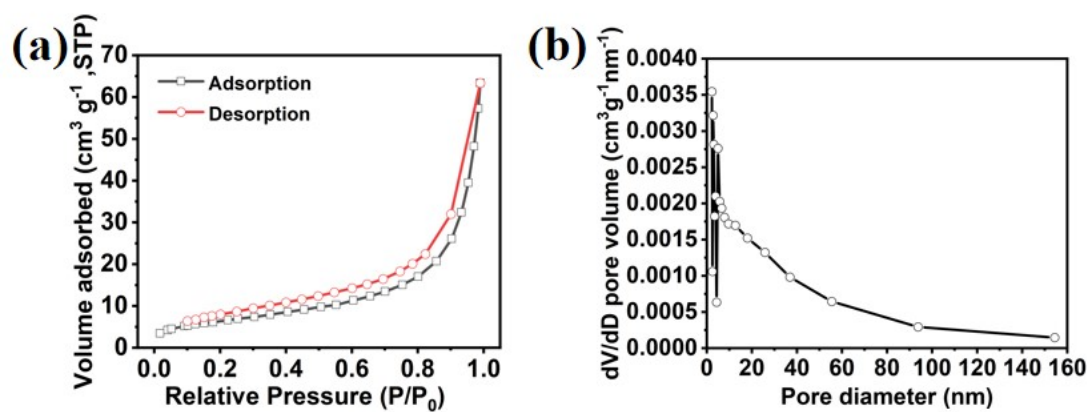

Fig.S2. (a) Nitrogen adsorption-desorption isotherms and (b) pore diameter distribution of NiCo-MOF/GO/CNTs-II

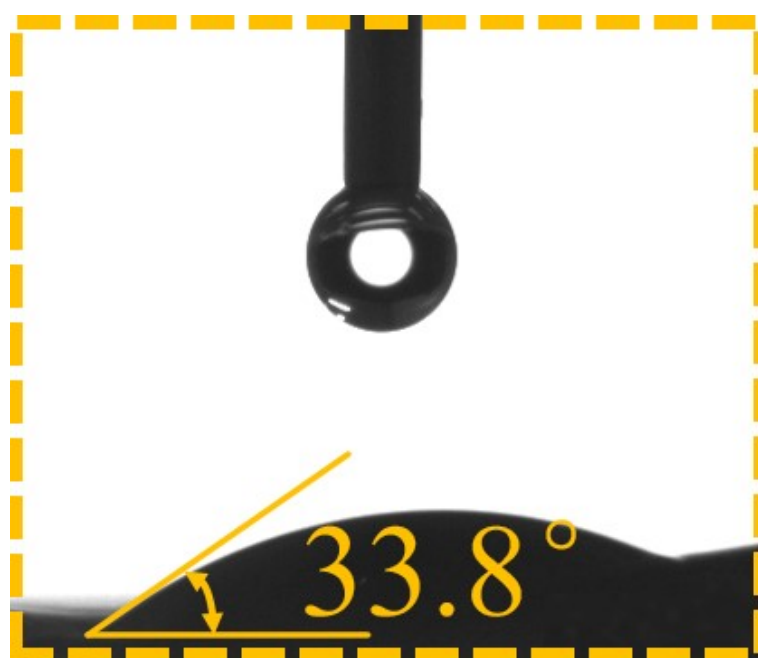

Fig.S3. Contact angle measurement of NiCo-MOF/GO/CNTs-II

The contact Angle of NiCo-MOF/GO/ CNT-II was 33.8°, indicating good wettability.

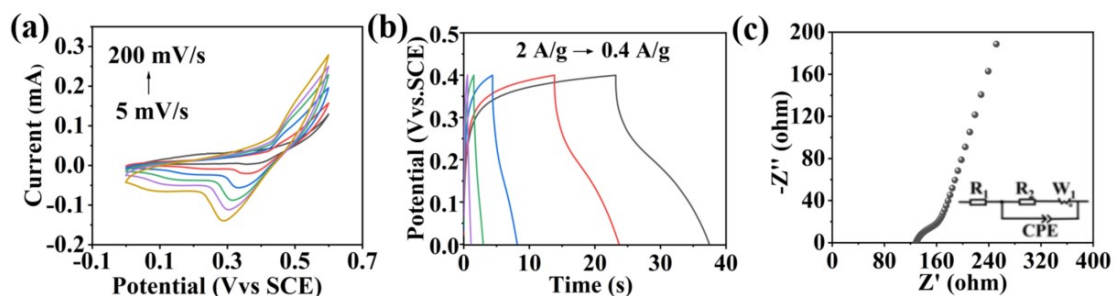

Fig.S4. (a) Cyclic voltammetry (CV) curves at varying scan rates, ranging from 5 to 200  $\text{mV s}^{-1}$  (from inside to outside: 5, 10, 20, 50, 100, and 200  $\text{mV s}^{-1}$ ), (b) GCD curves at different current densities, with current densities presented from left to right as 2, 1, 0.7, 0.5, and 0.4  $\text{A g}^{-1}$  for the bare NiCo-MOF film, and (c) Nyquist plots for bare NiCo-MOF

The calculated specific capacitance of the bare NiCo-MOF film is 14.6, 12.4, 6.6 , 3.7, and 2.7  $\text{F g}^{-1}$  at current densities of 0.4, 0.5, 0.7, 1, and 2  $\text{A g}^{-1}$ , respectively. Upon fitting the data, the equivalent series resistance of the bare NiCo-MOF films is 138  $\Omega$  and the charge transfer resistance is 26  $\Omega$  .

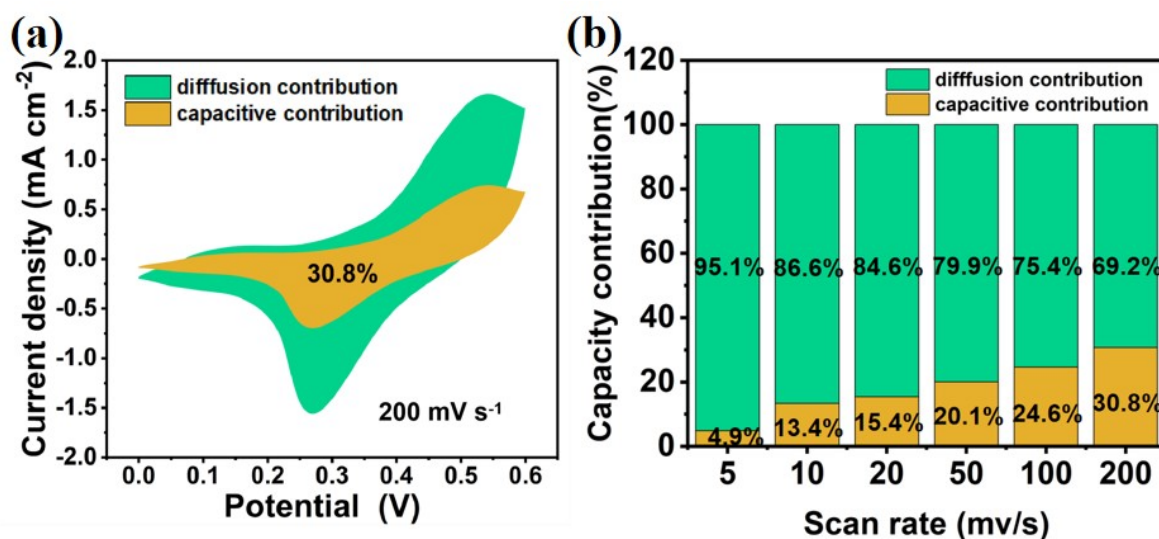

Fig.S5. (a) capacitive and diffusion contribution at 200  $\text{mV s}^{-1}$  for the MOF/GO/CNTs-II electrode and (b) bar graph of the capacitive and diffusion contribution at different scan rates
